# Supplementary material
Source: PubMed Central journal article supplement (PMC7380956)
Supplement: NIHMS1604433-supplement-Supplemental_Material_1.pdf [file NIHMS1604433-supplement-Supplemental_Material_1.pdf]

## SUPPLEMENTAL MATERIAL

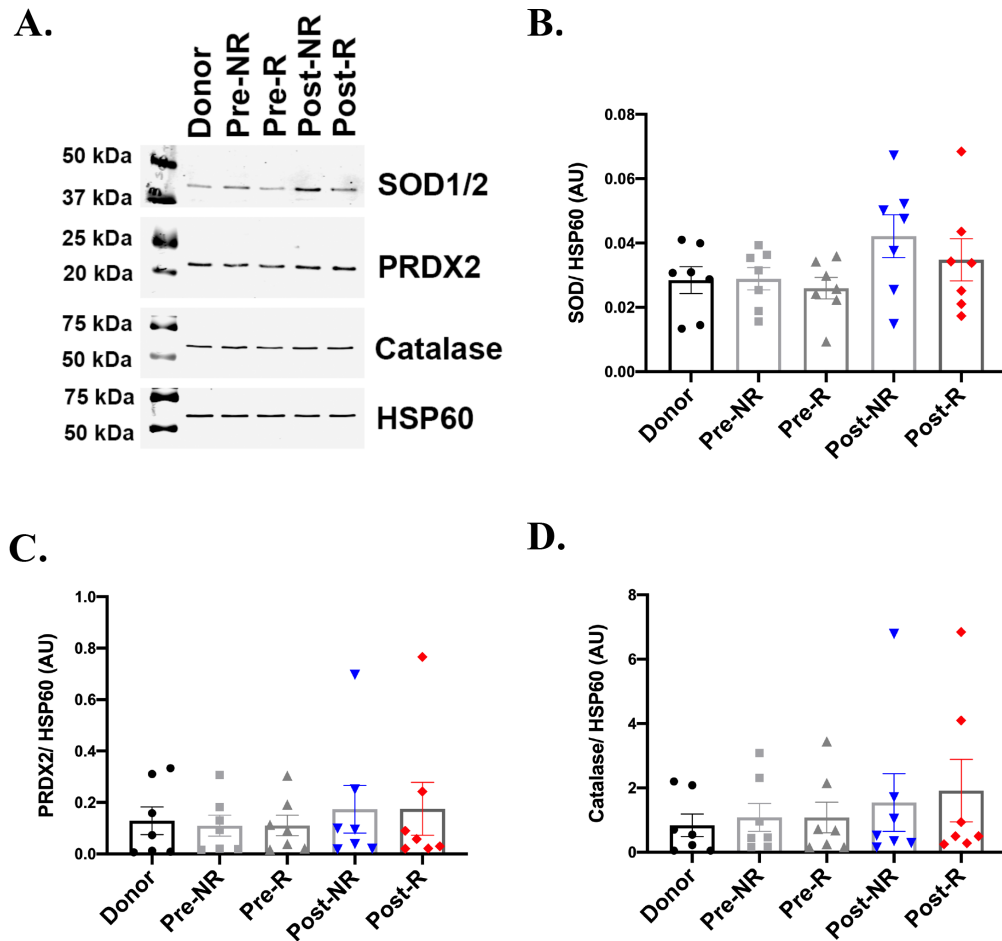

**Supplemental Figure 1: Antioxidant enzymes may play no role in myocardial recovery. A)** Representative western blot and densitometry showing similar levels of antioxidant enzymes **B)** superoxide dismutase 1/2 (SOD1/2), **C)** peroxidoxin 2 (PRDX2) and **D)** Catalase between responders (R) and non-responders (NR). Heat Shock protein (HSP60) serves as the lane loading control and values for graphs are normalized to HSP60.
